1 **Full Title:**

2  
3 Extremely Preterm Children Demonstrate Interhemispheric Hyperconnectivity During  
4 Verb Generation: a Multimodal Approach  
5  
6  
7

8 **Authors and Affiliations:**

9  
10 Maria E. Barnes-Davis, M.D., Ph.D.<sup>1,2,3\*</sup>  
11 Stephanie L. Merhar, M.D., M.S.<sup>1,2</sup>  
12 Scott K. Holland, Ph.D.<sup>4, 5</sup>  
13 Nehal A. Parikh, D.O., M.S.<sup>1,2</sup>  
14 Darren S. Kadis, Ph.D.<sup>6, 7</sup>  
15  
16  
17

18 <sup>1</sup> Cincinnati Children's Hospital Medical Center, Perinatal Institute  
19 <sup>2</sup> University of Cincinnati, Department of Pediatrics  
20 <sup>3</sup> University of Cincinnati, Department of Neuroscience  
21 <sup>4</sup> Medpace Imaging Core Laboratory, Medpace Inc.  
22 <sup>5</sup> University of Cincinnati, Department of Physics  
23 <sup>6</sup> Hospital for Sick Children, Neurosciences and Mental Health  
24 <sup>7</sup> University of Toronto, Department of Physiology  
25  
26  
27  
28

29 **\*Corresponding Author:**

30  
31 Maria E. Barnes-Davis, MD/PhD  
32 Assistant Professor, Department of Pediatrics  
33 University of Cincinnati College of Medicine  
34 Attending Neonatologist, Perinatal Institute  
35 Cincinnati Children's Hospital Medical Center  
36 E-mail: [maria.barnes@cchmc.org](mailto:maria.barnes@cchmc.org)  
37  
38  
39

40 **Running Title:** Preterm hyperconnectivity during verb generation  
41

42 **Declaration of Interest:** None relevant.  
43

44 **ABSTRACT**

45 Children born extremely preterm (EPT, <28 weeks gestation) are at risk for delays in  
46 development, including language. We use fMRI-constrained magnetoencephalography  
47 (MEG) during a verb generation task to assess the extent and functional connectivity  
48 (phase locking value, or PLV) of language networks in a large cohort of EPT children and  
49 their term comparisons (TC). 73 participants, aged 4 to 6 years, were enrolled (42 TC, 31  
50 EPT). There were no significant group differences in age, sex, race, ethnicity, parental  
51 education, or family income. There were significant group differences in expressive  
52 language scores ( $p < 0.05$ ). Language representation was not significantly different  
53 between groups on fMRI, with task-specific activation involving bilateral temporal and left  
54 inferior frontal cortex. There were group differences in functional connectivity seen in  
55 MEG. To identify a possible subnetwork contributing to focal spectral differences in  
56 connectivity, we ran Network Based Statistics analyses. For both beta (20-25 Hz) and  
57 gamma (61-70 Hz) bands, we observed a subnetwork showing hyperconnectivity in the  
58 EPT group ( $p < 0.05$ ). Network strength was computed for the beta and gamma  
59 subnetworks and assessed for correlation with language performance. For the EPT  
60 group, exclusively, strength of the subnetwork identified in the gamma frequency band  
61 was positively correlated with expressive language scores ( $r = 0.318$ ,  $p < 0.05$ ). Thus,  
62 interhemispheric hyperconnectivity is positively related to language for EPT children and  
63 might represent a marker for resiliency in this population.

64 **KEYWORDS**

65 Prematurity, Language, Functional MRI, Magnetoencephalography, Connectivity

66

## 67 1. INTRODUCTION

68 The development of noninvasive neuroimaging has enabled assessment of language  
69 representation across the lifespan, with task-based functional magnetic resonance  
70 imaging (fMRI, the gold standard for language mapping) demonstrating bilateral patterns  
71 of language activation which become increasingly left lateralized for most children as they  
72 mature into adulthood (Holland et al., 2001; Holland et al., 2007; Wood et al., 2004).  
73 Language relies on fast neuronal processes which can be transient and brief, occurring  
74 in a matter of milliseconds, and—by characterizing fast oscillatory activity—we can map  
75 language (Benasich, Gou, Choudhury, & Harris, 2008; Doesburg, Tingling, MacDonald,  
76 & Pang, 2016; Kadis, Dimitrijevic, Toro-Serey, Smith, & Holland, 2016; Kadis et al., 2007;  
77 Kadis et al., 2011). Magnetoencephalography (MEG) though less widely used than fMRI,  
78 affords sub-millisecond temporal resolution and can localize sources in the cortex,  
79 especially when combined with MRI (Kadis et al., 2016). This makes MEG especially  
80 suited to lifespan assessment of developing language networks in typically developing  
81 children and in clinical populations at risk for atypical language development (Barnes-  
82 Davis, Merhar, Holland, & Kadis, 2018; Gaudet, Hüsser, Vannasing, & Gallagher, 2020;  
83 Taylor, Donner, & Pang, 2012).

84 Prematurely born children represent one such clinical population. Preterm birth is  
85 a public health crisis, impacting 10% of children born in the United States every year and  
86 up to 15 million children globally every year (Blencowe et al., 2013; Martin, Hamilton,  
87 Osterman, & Driscoll, 2019). With advances in perinatal and neonatal care, children born  
88 as preterm as 22 weeks are now surviving. However, they still have significant risk for  
89 sensory and neurodevelopmental impairment (Adams-Chapman et al., 2018; Barre,

90 Morgan, Doyle, & Anderson, 2011; Hutchinson, De Luca, Doyle, Roberts, & Anderson,  
91 2013; Mikkola et al., 2005; Moore, Lemyre, Barrowman, & Daboval, 2013; van Noort-van  
92 der Spek, Franken, & Weisglas-Kuperus, 2012; Vohr, 2014). Children born preterm are  
93 at an increased risk for language impairment versus their term peers, with up to 40% of  
94 preterm children experiencing language delays and approximately 20% receiving a  
95 diagnosis of specific language impairment (Barre et al., 2011; Foster-Cohen, Edgin,  
96 Champion, & Woodward, 2007; Foster-Cohen, Friesen, Champion, & Woodward, 2010;  
97 van Noort-van der Spek et al., 2012; Woods, Rieger, Wocadlo, & Gordon, 2014). Term  
98 equivalent age neuroimaging with cranial ultrasound or structural MRI and early language  
99 testing such as the Bayley Scales of Infant Development at 18-24 months corrected  
100 gestational age leave a large proportion of the variance in later language performance  
101 unaccounted for and do not accurately predict delays (Luttikhuisen dos Santos, de  
102 Kieviet, Konigs, van Elburg, & Oosterlaan, 2013; Woods et al., 2014). This is important  
103 because early intervention programs are one of the few therapies that can improve  
104 neurodevelopmental outcomes, including language performance. Addressing language  
105 impairment early on might mitigate later impact on scholastic attainment and quality of life  
106 (Barre et al., 2011; Vieira & Linhares, 2011; Vohr, 2014).

107         Despite the numerous prenatal and neonatal risk factors for impairment that  
108 preterm children experience, there is great variability in outcome, with some children born  
109 extremely preterm (less than 28 weeks completed gestation) doing well (Garfield,  
110 Karbownik, Murthy, & et al., 2017). Furthermore, adults who were born preterm and their  
111 families express frustration that they were given overwhelming lists of risk factors in the  
112 neonatal intensive care unit (NICU) but little to no information on how to counter these

113 risks (Leavy, Prina, Martinez Caceres, & Bauer, 2015; Saigal, 2014). Investigations of  
114 resiliency factors—those that confer a positive outcome despite risk—should be  
115 prioritized along with risk factors and factors that are universally protective. The search  
116 for functional neuroimaging markers of risk and resiliency in the context of preterm birth  
117 is important in that it could provide metrics for risk stratification and predictive markers for  
118 later language functioning, perhaps before children exhibit verbal or language skills.  
119 Additionally, through the investigation of aberrant developmental trajectories (including  
120 those of children who spend the third trimester of gestation ex utero) we might gain new  
121 insights regarding the neurobiology of language that could be of utility for other clinical  
122 groups and for typically developing children. Existing literature evaluating connectivity  
123 supporting language in preterm children to date has relied primarily on resting state and  
124 task-based functional MRI. Taken as a whole, these functional MRI studies report  
125 increased interhemispheric connectivity and increased involvement of right-sided  
126 language homologue areas (Barnes-Davis et al., 2018; Choi, Vandewouw, Young, &  
127 Taylor, 2018; Gozzo et al., 2009; Kwon et al., 2015; Kwon et al., 2016; Myers et al., 2010;  
128 Schafer et al., 2009; Scheinost et al., 2015; Wilke, Hauser, Krageloh-Mann, & Lidzba,  
129 2014). However, relationships between connectivity and performance are inconsistent.

130 MEG has only been used in a handful of studies investigating neural networks in  
131 children born preterm (Barnes-Davis et al., 2018; Doesburg, Moiseev, Herdman, Ribary,  
132 & Grunau, 2013; Doesburg, Ribary, Herdman, Miller, et al., 2011; Doesburg, Ribary,  
133 Herdman, Moiseev, et al., 2011; Mossad, Smith, Pang, & Taylor, 2017; Sato et al., 2019;  
134 Ye, AuCoin-Power, Taylor, & Doesburg, 2016). Our prior pilot study of 15 children born  
135 EPT and 15 term comparison children (TC) was the first to use MEG to investigate the

136 connectivity of language networks in prematurity. We assessed representation and  
137 connectivity of language networks at 4-6 years of age using multimodal imaging during a  
138 receptive language paradigm (passive stories listening task). Language representation  
139 (fMRI) was not significantly different between groups (Barnes-Davis et al., 2018).  
140 However, functional connectivity (MEG) was significantly increased in EPT, with  
141 significantly greater network strength than term controls TC. Connectivity was increased  
142 in bilateral temporal regions, in accordance with fMRI connectivity studies in older preterm  
143 participants (Gozzo et al., 2009; Scheinost et al., 2015). Prior studies could not conclude  
144 if hyperconnectivity in EPT reflects an alternate developmental trajectory or immaturity of  
145 normal language lateralization (Gozzo et al., 2009). We were able to leverage the  
146 temporal resolution of MEG to assess information flux and concluded that  
147 hyperconnectivity was due to increased drivers in right perisylvian cortex, supporting our  
148 theory of an alternate developmental trajectory and not merely a delay in normal language  
149 lateralization (Barnes-Davis et al., 2018). Additionally, through investigation of diffusion  
150 imaging obtained in the same study visit, we were able to show this increased connectivity  
151 was due to an atypically robust extracallosal pathway connecting bilateral perisylvian  
152 cortices (Barnes-Davis, Williamson, Merhar, Holland, & Kadis, 2020b). Performance on  
153 language tasks was positively correlated with extracallosal structural connectivity for the  
154 preterm group exclusively.

155       Prior MEG studies suggest that activation in different frequency bands or  
156 involvement of different language regions in typically developing children could be due to  
157 differences in language processing based on participant characteristics or differences in  
158 task characteristics (expressive versus receptive, etc.) (Gaudet et al., 2020). Thus, it is

159 important to consider clinical groups, task demands, and language modalities when  
160 interpreting electrophysiological studies of language networks in the brain. MEG studies  
161 including preterm children have reported decreased task-based and resting state  
162 functional connectivity on the whole brain level (Doesburg et al., 2013; Doesburg, Ribary,  
163 Herdman, Miller, et al., 2011; Doesburg, Ribary, Herdman, Moiseev, et al., 2011; Ye et  
164 al., 2016). However, none have focused on language and some did not significantly  
165 correlate connectivity metrics with performance. The aim of this current paper is to  
166 investigate functional connectivity during an expressive language paradigm (a widely  
167 used verb generation task) to assess the extent and connectivity of language networks in  
168 the largest cohort of children born extremely preterm followed by MEG (known to us) to  
169 date. Furthermore, we will compare connectivity of EPT children to that of their term  
170 counterparts and assess relationships with performance. We hypothesize that EPT  
171 children will have increased bitemporal functional connectivity versus TC and that this  
172 hyperconnectivity will be positively related to performance on standardized language  
173 assessments (particularly expressive language tasks) for EPT but not for TC.

174

## 175 **2. METHODS**

### 176 **2.1. Participants**

177 This is a cohort study with 73 participants aged 4 to 6 years recruited from the  
178 greater Cincinnati area. TC (n=42) were recruited from local pediatric clinics and  
179 community announcements. EPT children (n=31) were recruited from Cincinnati-area  
180 neonatal intensive care units (NICUs) if they were born at less than 28 weeks gestation  
181 and were without parenchymal lesions, hemorrhage, or IVH >grade 2 on neonatal cranial

182 ultrasound. Children with cerebral palsy, seizures, migraines, and formally diagnosed  
183 psychiatric disorders such as autism or ADHD were excluded from both groups. Children  
184 with contraindications for MRI or MEG scanning (metal implants, insulin pumps, etc.) were  
185 excluded from both groups. Imaging and behavioral data were included from 3 studies  
186 investigating the language development of term born and preterm children using  
187 multimodal neuroimaging. All 3 studies are approved by the Cincinnati Children's Hospital  
188 Medical Center IRB and the IRBs of Cincinnati-area delivery hospitals. All study  
189 procedures conformed to the US Federal Policy for the Protection of Human Subjects.  
190 Written informed consent was obtained from parents and verbal assent from all children.

## 191 **2.2. Demographic and Neuropsychological Assessments**

192 For all participants, demographic data were recorded, including age, sex, race, and  
193 ethnicity. Socioeconomic variables such as parental education and family income were  
194 also recorded by the parents. Participants completed a neuropsychological testing battery  
195 including the Peabody Picture Vocabulary Test 4 (PPVT); the Expressive Vocabulary Test  
196 2 (EVT); and the Weschler Nonverbal Test of Abilities (WNV). The PPVT (Dunn, Dunn, &  
197 Lenhard, 2015) is a well-normed and well-validated test of receptive language/vocabulary  
198 that has been widely used in studies of outcomes in prematurity (Luu et al., 2009; Ment  
199 et al., 2006; Mullen et al., 2011; Myers et al., 2010). The EVT (Williams, 2007) is co-  
200 normed with the PPVT and is a well validated measure of expressive language. The WNV  
201 (Wechsler & Naglieri, 2006) is a nonverbal test of general abilities especially developed  
202 for populations where there is a high risk of language impairment or where English might  
203 not be the primary spoken language.

## 204 **2.3. Verb Generation Task**



205           The same verb generation stimuli were used in both MEG and fMRI. For fMRI, they  
206 were presented in a block design; for MEG, they were presented in an event-related,  
207 random presentation. This auditory covert verb generation task has been reported  
208 previously by our group (Holland et al., 2001; Kadis et al., 2016; Youssofzadeh,  
209 Williamson, & Kadis, 2017). In brief, the task consisted of nouns spoken by a female voice  
210 (verb generation condition) or speech-shaped noise, matched to the noun stimuli for  
211 spectral content and amplitude envelope (noise condition). Children were asked to  
212 covertly generate a verb or “think of an action word” upon hearing nouns; in contrast, they  
213 were asked to quietly attend to the noise stimuli, without responding. Prior to MEG  
214 recording, participants were trained on an overt version of the task to assess  
215 understanding and promote compliance during acquisition. During MEG acquisition, 71  
216 distinct nouns and 71 noise trials were randomly presented. During fMRI acquisition, the  
217 noun stimuli were presented at a rate of once every 5 sec, in five 30-sec blocks. During  
218 the control block, children were asked to simply listen to the noise stimuli, presented every  
219 5 seconds, in six 30-sec blocks. Participants listened to a total of 30 nouns and 36 noise  
220 tones during the fMRI recordings, lasting less than 6 minutes.

#### 221 **2.4. Magnetoencephalography Acquisition**

222           To avoid potential magnetization from the MRI, MEG was always acquired before  
223 MRI imaging on a 275-channel whole-head CTF system (MEG International Services Ltd.,  
224 Coquitlam, BC). Neuromagnetic activity was recorded at 1200Hz. Subjects were tested  
225 while awake and in the supine position. Auditory stimuli were presented via a calibrated  
226 audio system comprised of distal transducer, tubing, and ear inserts (Etymotic Research,  
227 IL, USA). Head localization coils were placed at nasion and preauricular locations to

228 monitor movement throughout the recording. Following acquisition, the coils were  
229 replaced with radio-opaque markers, to facilitate offline co-registration of MRI and MEG  
230 data.

## 231 **2.5. Magnetic Resonance Acquisition**

232 All subjects were studied awake without sedation in the presence of an  
233 experienced pediatric radiology technician, a pediatric clinical research coordinator, and  
234 a parent or legal guardian. This sample consists of children from 2 distinct studies on  
235 multimodal imaging of language in prematurity. The first study used a single echo fMRI  
236 acquisition. The second study used a multi-echo fMRI acquisition. For both studies,  
237 extremely preterm and term children were enrolled and the task, imaging site, and  
238 scanner remained the same. We conducted fMRI scanning at 3T (Philips Achieva  
239 scanner). The single echo acquisition (used for 12 EPT children and 13 TC children) had  
240 TR / TE = 2000 / 30 ms, flip=75°, 2.8 x 2.8 x 3.0 mm voxels. The multi echo acquisition  
241 (used for 17 EPT children and 29 TC) had TR 1381.14 ms; TE 14, 32, and 50 ms; 3.0 x  
242 3.0 x 3.0 mm voxels; 308 dynamics; multiband factor 3; and in-plane SENSE factor of 3).  
243 For this analysis, we used only the middle echo (32 ms) for fMRI preprocessing and first  
244 and second level contrasts. Scan duration for both acquisitions was about 5 minutes. We  
245 obtained 3D T1-weighted volumes at 1.0 x 1.0 x 1.0 mm.

## 246 **2.6. Demographic and Neuropsychological Data Analyses**

247 Between group comparisons of continuous variables (age, assessment scores) were  
248 performed using independent samples t-tests in SPSS Statistics 26 running in Mac OS  
249 10.15.6. Categorical variables (sex, race, ethnicity, parental education, household  
250 income) were compared between groups using Fisher's exact test.

## 251 **2.7. Magnetic Resonance Imaging Analyses**

252 Task-based fMRI data were analyzed using a conventional general linear model  
253 preprocessing pipeline in SPM12 (<http://www.fil.ion.ucl.ac.uk/spm/software/spm12/>)  
254 running in MatLab R2020a (MathWorks Inc., Natick, MA). This has been detailed in  
255 previous publications (Barnes-Davis et al., 2018; Kadis et al., 2016). The preprocessing  
256 pipeline included realignment, co-registration to the individual subject's T1-weighted  
257 images, normalization to template space (MNI 152), and smoothing with a full width half  
258 maximum (FWHM) of 5 mm. Task-based fMRI data were subjected to first- and second-  
259 level analyses as detailed in previous publications (Barnes-Davis et al., 2018; Kadis et  
260 al., 2016). At the first level, a Verb minus Noise contrast, with size motion parameters  
261 included as nuisance regressors, was evaluated to assess activation that was measured  
262 in response to the language stimulus versus the noise condition. At the second level, first  
263 level condition contrasts were collected and subjected to a between groups independent  
264 samples t test evaluating the spatial distribution of activation in response to the language  
265 task. For this contrast,  $p < 0.001$  and  $k = 8$ . This was assessed with and without a family-  
266 wise error correction of  $p < 0.05$  and with and without accounting for imaging acquisition  
267 (single echo versus multi echo). Groupwise activation, including all preterm and term  
268 participants, were included in the joint activation map. This was parcellated into 200  
269 random units (Craddock, James, Holtzheimer, Hu, & Mayberg, 2012). Parcels having  
270 greater than 10% active voxels were retained, and the center of gravity was calculated  
271 for each parcel. These coordinates were determined and served as coordinate for virtual  
272 sensors in MEG connectivity analyses and subsequent graph theoretical analyses.

## 273 **2.8. Magnetoencephalography Analyses**

274           **2.8.1. Virtual Sensor Extraction and Preprocessing.** Data were analyzed using  
275 FieldTrip, an open-source MatLab toolbox for analyses of electrophysiological data,  
276 including MEG (Oostenveld, Fries, Maris, & Schoffelen, 2011). Continuous  
277 neuromagnetic data were bandpass filtered from 0.1Hz to 100Hz, and 60Hz power-line  
278 noise attenuated using a sharp discrete Fourier transform filter. The data were then  
279 segmented into epochs of interest (700-1200ms from onset of language stimuli) to remain  
280 consistent with previous work in term children (Kadis et al., 2011; Youssofzadeh et al.,  
281 2017). Scanner jump artifacts were automatically detected, and the affected trials were  
282 rejected. We required at least 90% trial retention for inclusion in subsequent analyses.  
283 Realistic single-shell head models were constructed from the participants' 3D T1  
284 weighted images (Nolte, 2003). A 3-D grid was constructed with dipole resolution of 5 mm  
285 on a template (MNI151) brain volume. The template grid was warped to individual  
286 anatomical space, and used to develop individual source models. Using a linearly  
287 constrained minimum-variance beamformer (LCMV) with 0.1% regularization, we  
288 estimated the time series of activity at each network node (virtual sensor analysis) similar  
289 to our previously reported work (Barnes-Davis et al., 2018).

290           **2.8.2. Functional Connectivity.** Phase locking value (PLV) was used to assess  
291 functional connectivity in MEG. PLV reflects the consistency of a phase relationship  
292 between two signals, with values ranging from 0 (no phase synchrony) to 1 (perfect phase  
293 synchrony) (Bastos & Schoffelen, 2016; Lachaux, Rodriguez, Martinerie, & Varela, 1999;  
294 Youssofzadeh et al., 2017). Using FieldTrip, connectivity analyses were performed on the  
295 time courses at each virtual sensor. The trials were zero padded to 2 seconds total to  
296 minimize edge effects. A multi-taper method FFT (+/- 5Hz smoothing) decomposition,

297 over a frequency range of 2-70 Hz and a step of 0.5 Hz, was used. The connectivity  
298 spectra were then plotted by group and visually inspected. Frequency bands in which  
299 there were apparent group differences were identified; connectivity within those bands  
300 was averaged, and the resulting adjacency matrices were subjected to analysis using  
301 Network Based Statistics (NBS). The approach is useful for identifying potential  
302 subnetworks contributing to observed network-wide group differences in connectivity.  
303 Here, we studied network extent as a function of group across a range of initial thresholds,  
304 using an overall p value of 0.05 and for 5000 permutations (Zalesky, Fornito, & Bullmore,  
305 2010). For the purpose of visualization, the median t-value yielding significant NBS results  
306 was used to characterize the subnetworks showing group differences. Surviving  
307 connections were summed for each subject to assess network strength. Network strength  
308 was then assessed for correlation with expressive language scores across and within  
309 groups.

310

### 311 **3. RESULTS**

#### 312 **3.1. Demographic and Neuropsychological Assessments**

313 There were no significant group differences in age, sex, race, ethnicity, highest  
314 parental education, combined family income, PPVT scores, or WNV scores (see Table  
315 1). There were significant group differences in expressive language scores (mean  
316 standardized EVT scores were 102.6 +/- standard deviation of 9.4 for the EPT group and  
317 111.7 +/- standard deviation of 15.9 for the TC group). An outlier was identified with  
318 significantly decreased scores (greater than 2 standard deviations below the mean) on  
319 standardized assessments (population mean for each of these instruments is 100, with a

320 standard deviation of 15). This individual was removed from subsequent analyses,  
321 leaving 30 EPT children and 42 TC children in the final connectivity analysis. For the  
322 preterm group, gestational age at birth ranged from 24 weeks to 27 weeks and 5 days.  
323 For the term group, gestational age ranged from 37 to 41 weeks.

### 324 **3.2. Activation in Functional Magnetic Resonance Imaging**

325 Of the 73 children included in the study, 7 TC children and 4 EPT children did not  
326 complete neuroimaging due to scheduling issues (e.g. arriving late to the study visit and  
327 needing to stop visit before all tasks were completed) or noncompliance with task  
328 (movement or wanting to stop imaging). Thus, 62 children were included in the fMRI  
329 analyses (35 TC and 27 EPT).

330 There were no significant differences in language representation in fMRI, between  
331 groups. Activation in response to verb generation versus the noise condition involved the  
332 expected regions, including bilateral temporal and left inferior frontal cortex (Figure 1A).  
333 To create a balanced joint activation map for subsequent MEG analyses, a subset (n =  
334 53) of participants were randomly selected for participation in the task, with equitable  
335 representation between groups (EPT versus TC) and study acquisitions (single echo  
336 versus multi-echo fMRI). The joint activation map was generated from the first level  
337 contrast maps (verbs versus noise) from 14 TC from the multi-echo acquisition, 14 EPT  
338 from the multi-echo acquisition, 13 TC from the single echo acquisition, and 12 EPT from  
339 the single echo acquisition.

### 340 **3.3. Connectivity in Magnetoencephalography**

341 Virtual sensors were obtained from multiplying the fMRI verb generation joint  
342 activation map with a 200 unit random parcellation map and extracting center of gravity

343 coordinates from parcels with over 10% active voxels. These virtual sensors are shown  
344 in in Figure 1B and served as nodes for subsequent connectivity and network analyses.  
345 Phase locking value (PLV) was computed for all node pairs for each participant as  
346 described above, and plotted as a function of frequency, for each group (Figure 2). We  
347 visually inspected the connectivity spectra and identified 2 bands in which we suspected  
348 EPT and TC children would significantly differ. We noted apparent increased functional  
349 connectivity in the EPT group in a contiguous band within the canonical beta frequency  
350 range (20-25 Hz) and in the canonical gamma frequency range (61-70 Hz). This  
351 hyperconnectivity was assessed and non-parametrically tested for group differences in  
352 network extent using NBS with 5000 permutations and familywise error correction set at  
353  $p < 0.05$ . A subnetwork was identified in the beta range (Figure 3) which was significant at  
354 a range of t statistic thresholds from 1 to 2. An addition subnetwork was identified in NBS  
355 within the low gamma range which was significant at a range of t statistic thresholds from  
356 1 to 4 (Figure 4). Network strength was computed for both the beta and the gamma  
357 subnetworks and related to performance on standardized assessments of language and  
358 general abilities across and within groups.

359 Strength in the beta and gamma subnetworks was not significantly related to  
360 performance across groups or within the TC group. However, for the EPT group  
361 exclusively, strength of the subnetwork identified in the gamma frequency band was  
362 positively correlated with standardized expressive language scores on the EVT (Figure  
363 5,  $r = 0.32$ ,  $p < 0.05$ ).

364 As an exploratory analysis, we assessed for significant differences in language  
365 scores and brain connectivity by sex (female versus male) due to the known differential

366 effect of sex on prematurity and language (Benavides et al., 2019; O'Driscoll, McGovern,  
367 Greene, & Molloy, 2018). Within the EPT group, there were no significant differences in  
368 neurobehavioral scores, but females did have significantly higher network strength in both  
369 the beta band (mean strength 65.39 for males and 70.89 for females,  $p < 0.05$ ) and in the  
370 gamma band (mean strength 24.8 for males and 26.88 for females,  $p < 0.05$ ). Across  
371 groups, there were no significant differences by sex in neurobehavioral scores or gamma  
372 connectivity, but there was significantly higher network strength in the beta band for  
373 females (mean strength 59.0 for males and 64.66 for females,  $p < 0.05$ ). Within the control  
374 group, there were no significant differences between males and females.

375

#### 376 **4. DISCUSSION**

377 In this contemporary cohort study of extremely preterm children with no known brain  
378 injury or neurological disorder and their term comparison children, we demonstrate  
379 significantly increased functional connectivity as indexed by MEG in preterm children  
380 versus term controls. This functional hyperconnectivity is significantly related to  
381 performance on standardized assessments of expressive language for the EPT group  
382 exclusively, despite no significant differences on language representation using  
383 conventionally analyzed task-based functional MRI. There were no significant differences  
384 between groups in WNV scores, used as a marker of general abilities. Functional  
385 connectivity was not significantly related to WNV scores, so our observed findings should  
386 not be attributed to global differences in performance or intelligence. As such, functional  
387 hyperconnectivity of areas known to support language in preterm children might represent  
388 an alternate developmental trajectory or compensatory network which enables EPT



389 children to perform within normal limits on language assessments and comparably to term  
390 controls. This work is congruent with our earlier MEG and fMRI work on a smaller sample  
391 of EPT children and their term controls reporting functional and effective  
392 hyperconnectivity in the beta band for preterm children during a receptive stories listing  
393 task.

394 This work is significant in that it reports neuromagnetic findings in the largest cohort  
395 of extremely preterm children with magnetoencephalography and structural and  
396 functional magnetic resonance imaging that we know of to date. It is also important to  
397 note that these children are without known brain injury, so the findings likely represent a  
398 relatively “pure” effect of the dysmaturation that occurs due to preterm birth and not due  
399 to other common comorbid conditions such as periventricular leukomalacia or  
400 interventricular hemorrhage. There were no significant differences between groups in  
401 terms of family income or parental education. These variables are often used in indices  
402 of socioeconomic status, or SES, which are known to have differential impacts on both  
403 language and outcomes in prematurity. Furthermore, although there were no significant  
404 effects of sex on the connectivity results or on neuropsychological assessments when  
405 explored through bivariate correlations or independent samples t tests across groups  
406 (EPT + TC) or within the TC group, within the EPT group there were significant sex  
407 differences, with females exhibiting significantly increased network strength in both the  
408 beta and gamma frequency bands. There were no performance differences between  
409 preterm males and females. This finding warrants further investigation.

410 When viewed in the context of reported research from our group and from other labs,  
411 it seems that differential neuronal activation frequencies (beta versus gamma, etc.) and

412 relationship to performance could be due to different task demands. For example, our  
413 prior work reported functional hyperconnectivity in the beta frequency range during a  
414 stories listening task. This verb generation task requires not only auditory processing  
415 and comprehension but also semantic retrieval and language production. The gamma  
416 hyperconnectivity we report as being significantly related to expressive language scores  
417 is known to be important in the typical development of language skills in children.  
418 Benasich et al found that children less than 3 years of age with a family history of  
419 language impairment had lower resting gamma connectivity on electroencephalography  
420 than term born children without a history of language impairment (Benasich et al., 2008).  
421 In prior EEG work investigating the ontogeny of EEG activity and synchronization before  
422 and after term equivalent age, gamma activation is of particular interest (Vanhatalo &  
423 Kaila, 2006). Higher frequency activation and synchrony becomes more prominent as  
424 interneuronal signaling matures during the same gestational period in which our preterm  
425 participants were born (Tokariev, Palmu, Lano, Metsäranta, & Vanhatalo, 2012;  
426 Vanhatalo & Kaila, 2006).

427 Our study has some relative limitations. The verb generation task was covert.  
428 Therefore, it might be difficult to gauge engagement and performance during the task.  
429 However, all participants demonstrated they could perform the task well during the  
430 practice items. Additionally, 11 out of 73 children had structural MRI and task-based MEG  
431 but did not complete the verb generation task in functional MRI. The verb generation task  
432 in fMRI was the last task of our study visit, and was sometimes excluded from the visit if  
433 the family was late for their appointment due to time constraints or stopped early if the  
434 child stated they were finished with imaging for the day. We will attempt to rectify this in

435 future studies. We combined task-based fMRI data from 2 slightly different acquisitions  
436 on the same scanner using the same stimuli. We do not run connectivity analyses on the  
437 fMRI data and use it only to determine if differences in representation differ between  
438 groups before binarizing the first level contrast maps of activation to extract virtual  
439 sensors for MEG analyses. There were no differences in fMRI representation by group  
440 (both with and without regressing out activation differences due to acquisition). Therefore,  
441 differences in fMRI acquisition (if any exist) should not impact our MEG connectivity  
442 analyses. Finally, our preterm group and control groups both perform very well on  
443 standardized assessments of language (although the EPT group has significantly lower  
444 scores than the TC group). It is important to note that this is a community acquired self-  
445 selected sample and, therefore, might be higher performing than the general population.  
446 However, both groups perform within normal limits (standardized mean of 100 +/- 1  
447 standard deviation) and our research question specifically pertains to factors that might  
448 help optimize performance in our clinical population.

449 Our study has a number of unique strengths. This is a contemporary cohort of  
450 extremely preterm children from a relatively narrow band of gestational ages (24-27  
451 weeks), including some periviable children for whom resuscitation was entirely elective at  
452 time of birth. We excluded known comorbidities of prematurity, such as periventricular  
453 leukomalacia and neurological disorders. Due to differential rates of--and impact from--  
454 prematurity, we assessed any differences in sex, race, ethnicity, and socioeconomic  
455 status and accounted for these factors in analysis, finding no significant differences.  
456 Finally, we used a multimodal neuroimaging pipeline that enables investigation into the  
457 cortical morphometry (Barnes-Davis, Williamson, Merhar, Holland, & Kadis, 2020a);

458 structural connectivity (Barnes-Davis et al., 2020b); functional connectivity (Barnes-Davis  
459 et al., 2018); and neurobehavioral outcomes for our preterm and term participants at a  
460 single session. Multimodal investigations such as this have received attention recently in  
461 the scientific community as a way to increase reproducibility in functional imaging  
462 (Botvinik-Nezer et al., 2020).

463 In conclusion, we have demonstrated functional hyperconnectivity as indexed by  
464 fMRI-constrained MEG during a covert auditory verb generation task in the gamma  
465 frequency band for well-performing children born extremely preterm. Strength in this  
466 significant subnetwork (consisting of bilateral temporal and left frontal nodes) positively  
467 correlated with expressive language performance for the preterm group exclusively. This  
468 might serve as a marker of resiliency in preterm children with no known brain injury or  
469 neurological deficit. Future work will expand this cohort and follow them longitudinally to  
470 investigate the predictive power of our reported functional hyperconnectivity.

471

## 472 **5. ACKNOWLEDGEMENTS**

473 We thank the participants and their families. We acknowledge the study coordination  
474 of Adrienne King, Cameron Laue, Claudio Toro-Serey, Sara Stacey, and Sandra Wuertz.  
475 This work was funded by an award from the National Institute of Child Health and Human  
476 Development (K12 HD028827 for MEB-D); an award from the National Center for  
477 Advancing Translational Sciences (KL2 TR001426 for SLM); awards from the National  
478 Institute of Neurological Disorders and Stroke (R01-NS096037 and R01-NS094200 for  
479 NAP); and by a Trustee Award Grant (DSK), a Shared Facilities Discovery Award (SLM),

480 and an Arnold W. Strauss Fellowship Award for Excellence in Research (MEB-D) from  
481 the Cincinnati Children's Hospital Medical Center.

482

483

484 **REFERENCES**

- 485
- 486 Adams-Chapman, I., Heyne, R. J., DeMauro, S. B., Duncan, A. F., Hintz, S. R., Pappas,  
487 A., . . . Higgins, R. D. (2018). Neurodevelopmental Impairment Among Extremely  
488 Preterm Infants in the Neonatal Research Network. *Pediatrics*.
- 489 Barnes-Davis, M. E., Merhar, S. L., Holland, S. K., & Kadis, D. S. (2018). Extremely  
490 preterm children exhibit increased interhemispheric connectivity for language:  
491 findings from fMRI-constrained MEG analysis. *Dev Sci*, e12669.
- 492 Barnes-Davis, M. E., Williamson, B. J., Merhar, S. L., Holland, S. K., & Kadis, D. S.  
493 (2020a). Extremely preterm children exhibit altered cortical thickness in language  
494 areas. *Scientific Reports*, 10(1), 10824.
- 495 Barnes-Davis, M. E., Williamson, B. J., Merhar, S. L., Holland, S. K., & Kadis, D. S.  
496 (2020b). Rewiring the Extremely Preterm Brain: Altered Structural Connectivity  
497 Relates to Language Function. *NeuroImage: Clinical*, 102194.
- 498 Barre, N., Morgan, A., Doyle, L. W., & Anderson, P. J. (2011). Language abilities in  
499 children who were very preterm and/or very low birth weight: a meta-analysis. *J*  
500 *Pediatr*, 158(5), 766-774 e761.
- 501 Bastos, A. M., & Schoffelen, J.-M. (2016). A Tutorial Review of Functional Connectivity  
502 Analysis Methods and Their Interpretational Pitfalls. *Frontiers in Systems*  
503 *Neuroscience*, 9(175).
- 504 Benasich, A., Gou, Z., Choudhury, N., & Harris, K. (2008). Early cognitive and language  
505 skills are linked to resting frontal gamma power across the first 3 years.  
506 *Behavioural brain research*, 195(2), 215-222.

- 507 Benavides, A., Metzger, A., Tereshchenko, A., Conrad, A., Bell, E. F., Spencer, J., . . .  
508 Nopoulos, P. (2019). Sex-specific alterations in preterm brain. *Pediatr Res*, *85*(1),  
509 55-62.
- 510 Blencowe, H., Cousens, S., Chou, D., Oestergaard, M., Say, L., Moller, A.-B., . . . Born  
511 Too Soon Preterm Birth Action, G. (2013). Born too soon: the global epidemiology  
512 of 15 million preterm births. *Reproductive health*, *10 Suppl 1*(Suppl 1), S2-S2.
- 513 Botvinik-Nezer, R., Holzmeister, F., Camerer, C. F., Dreber, A., Huber, J., Johannesson,  
514 M., . . . Schonberg, T. (2020). Variability in the analysis of a single neuroimaging  
515 dataset by many teams. *Nature*, *582*(7810), 84-88.
- 516 Choi, E. J., Vandewouw, M. M., Young, J. M., & Taylor, M. J. (2018). Language Network  
517 Function in Young Children Born Very Preterm. *Front Hum Neurosci*, *12*, 512.
- 518 Craddock, R., James, G., Holtzheimer, P., Hu, X., & Mayberg, H. (2012). A whole brain  
519 fMRI atlas generated via spatially constrained spectral clustering. *Hum Brain*  
520 *Mapp*, *33*.
- 521 Doesburg, S. M., Moiseev, A., Herdman, A. T., Ribary, U., & Grunau, R. E. (2013).  
522 Region-Specific Slowing of Alpha Oscillations is Associated with Visual-Perceptual  
523 Abilities in Children Born Very Preterm. *Front Hum Neurosci*, *7*, 791.
- 524 Doesburg, S. M., Ribary, U., Herdman, A. T., Miller, S. P., Poskitt, K. J., Moiseev, A., . . .  
525 Grunau, R. E. (2011). Altered long-range alpha-band synchronization during visual  
526 short-term memory retention in children born very preterm. *NeuroImage*, *54*(3),  
527 2330-2339.

- 528 Doesburg, S. M., Ribary, U., Herdman, A. T., Moiseev, A., Cheung, T., Miller, S. P., . . .  
529 Grunau, R. E. (2011). Magnetoencephalography reveals slowing of resting peak  
530 oscillatory frequency in children born very preterm. *Pediatr Res*, 70(2), 171-175.
- 531 Doesburg, S. M., Tingling, K., MacDonald, M. J., & Pang, E. W. (2016). Development of  
532 Network Synchronization Predicts Language Abilities. *J Cogn Neurosci*, 28(1), 55-  
533 68.
- 534 Dunn, L. M., Dunn, D. M., & Lenhard, A. (2015). *Peabody picture vocabulary test: PPVT*  
535 4: Pearson.
- 536 Foster-Cohen, S., Edgin, J. O., Champion, P. R., & Woodward, L. J. (2007). Early delayed  
537 language development in very preterm infants: evidence from the MacArthur-Bates  
538 CDI. *J Child Lang*, 34(3), 655-675.
- 539 Foster-Cohen, S., Friesen, M. D., Champion, P. R., & Woodward, L. J. (2010). High  
540 prevalence/low severity language delay in preschool children born very preterm. *J*  
541 *Dev Behav Pediatr*, 31(8), 658-667.
- 542 Garfield, C. F., Karbownik, K., Murthy, K., & et al. (2017). Educational performance of  
543 children born prematurely. *JAMA Pediatr*.
- 544 Gaudet, I., Hüsser, A., Vannasing, P., & Gallagher, A. (2020). Functional Brain  
545 Connectivity of Language Functions in Children Revealed by EEG and MEG: A  
546 Systematic Review. *Front Hum Neurosci*, 14(62).
- 547 Gozzo, Y., Vohr, B., Lacadie, C., Hampson, M., Katz, K. H., Maller-Kesselman, J., . . .  
548 Ment, L. R. (2009). Alterations in neural connectivity in preterm children at school  
549 age. *NeuroImage*, 48(2), 458-463.



- 550 Holland, S. K., Plante, E., Weber Byars, A., Strawsburg, R. H., Schmithorst, V. J., & Ball,  
551 W. S. (2001). Normal fMRI brain activation patterns in children performing a verb  
552 generation task. *NeuroImage*, 14(4).
- 553 Holland, S. K., Vannest, J., Mecoli, M., Jacola, L. M., Tillema, J. M., Karunanayaka, P.  
554 R., . . . Byars, A. W. (2007). Functional MRI of language lateralization during  
555 development in children. *Int J Audiol*, 46(9), 533-551.
- 556 Hutchinson, E. A., De Luca, C. R., Doyle, L. W., Roberts, G., & Anderson, P. J. (2013).  
557 School-age Outcomes of Extremely Preterm or Extremely Low Birth Weight  
558 Children. *Pediatrics*.
- 559 Kadis, D. S., Dimitrijevic, A., Toro-Serey, C. A., Smith, M. L., & Holland, S. K. (2016).  
560 Characterizing Information Flux Within the Distributed Pediatric Expressive  
561 Language Network: A Core Region Mapped Through fMRI-Constrained MEG  
562 Effective Connectivity Analyses. *Brain Connect*, 6(1), 76-83.
- 563 Kadis, D. S., Iida, K., Kerr, E. N., Logan, W. J., McAndrews, M. P., Ochi, A., . . . Smith,  
564 M. L. (2007). Intrahemispheric reorganization of language in children with  
565 medically intractable epilepsy of the left hemisphere. *Journal of the International  
566 Neuropsychological Society*, 13(3), 505-516.
- 567 Kadis, D. S., Pang, E. W., Mills, T., Taylor, M. J., McAndrews, M. P., & Smith, M. L. (2011).  
568 Characterizing the normal developmental trajectory of expressive language  
569 lateralization using magnetoencephalography. *J Int Neuropsychol Soc*, 17(5), 896-  
570 904.

- 571 Kwon, S. H., Scheinost, D., Lacadie, C., Sze, G., Schneider, K. C., Dai, F., . . . Ment, L.  
572 R. (2015). Adaptive mechanisms of developing brain: cerebral lateralization in the  
573 prematurely-born. *NeuroImage*, *108*, 144-150.
- 574 Kwon, S. H., Scheinost, D., Vohr, B., Lacadie, C., Schneider, K., Dai, F., . . . Ment, L. R.  
575 (2016). Functional magnetic resonance connectivity studies in infants born  
576 preterm: suggestions of proximate and long-lasting changes in language  
577 organization. *Dev Med Child Neurol*, *58 Suppl 4*, 28-34.
- 578 Lachaux, J. P., Rodriguez, E., Martinerie, J., & Varela, F. J. (1999). Measuring phase  
579 synchrony in brain signals. *Hum Brain Mapp*, *8(4)*, 194-208.
- 580 Leavy, M. P., Prina, M. V., Martinez Caceres, M. J., & Bauer, G. (2015). Social  
581 representations of premature birth from the perspective of individuals born preterm  
582 in the 1990s.
- 583 Luttikhuisen dos Santos, E. S., de Kieviet, J. F., Konigs, M., van Elburg, R. M., &  
584 Oosterlaan, J. (2013). Predictive value of the Bayley scales of infant development  
585 on development of very preterm/very low birth weight children: a meta-analysis.  
586 *Early Hum Dev*, *89(7)*, 487-496.
- 587 Luu, T. M., Vohr, B. R., Schneider, K. C., Katz, K. H., Tucker, R., Allan, W. C., & Ment, L.  
588 R. (2009). Trajectories of receptive language development from 3 to 12 years of  
589 age for very preterm children. *Pediatrics*, *124(1)*, 333-341.
- 590 Martin, J., Hamilton, B., Osterman, M., & Driscoll, A. (2019). Births:Final Data for 2018.  
591 *National Vital Statistics Reports*, *68(13)*.
- 592 Ment, L. R., Peterson, B. S., Meltzer, J. A., Vohr, B., Allan, W., Katz, K. H., . . . Constable,  
593 R. T. (2006). A functional magnetic resonance imaging study of the long-term

594 influences of early indomethacin exposure on language processing in the brains  
595 of prematurely born children. *Pediatrics*, 118(3), 961-970.

596 Mikkola, K., Ritari, N., Tommiska, V., Salokorpi, T., Lehtonen, L., Tammela, O., . . .  
597 Fellman, V. (2005). Neurodevelopmental outcome at 5 years of age of a national  
598 cohort of extremely low birth weight infants who were born in 1996-1997.  
599 *Pediatrics*, 116(6), 1391-1400.

600 Moore, G. P., Lemyre, B., Barrowman, N., & Daboval, T. (2013). Neurodevelopmental  
601 outcomes at 4 to 8 years of children born at 22 to 25 weeks' gestational age: a  
602 meta-analysis. *JAMA Pediatr*, 167(10), 967-974.

603 Mossad, S. I., Smith, M. L., Pang, E. W., & Taylor, M. J. (2017). Neural correlates of  
604 "Theory of Mind" in very preterm born children. *Hum Brain Mapp*, 38(11), 5577-  
605 5589.

606 Mullen, K. M., Vohr, B. R., Katz, K. H., Schneider, K. C., Lacadie, C., Hampson, M., . . .  
607 Ment, L. R. (2011). Preterm birth results in alterations in neural connectivity at age  
608 16 years. *NeuroImage*, 54(4), 2563-2570.

609 Myers, E. H., Hampson, M., Vohr, B., Lacadie, C., Frost, S. J., Pugh, K. R., . . . Ment, L.  
610 R. (2010). Functional connectivity to a right hemisphere language center in  
611 prematurely born adolescents. *NeuroImage*, 51(4), 1445-1452.

612 Nolte, G. (2003). The magnetic lead field theorem in the quasi-static approximation and  
613 its use for magnetoencephalography forward calculation in realistic volume  
614 conductors. *Physics in Medicine and Biology*, 48(22), 3637-3652.

615 O'Driscoll, D. N., McGovern, M., Greene, C. M., & Molloy, E. J. (2018). Gender disparities  
616 in preterm neonatal outcomes. *Acta Paediatrica*, 107(9), 1494-1499.

- 617 Oostenveld, R., Fries, P., Maris, E., & Schoffelen, J.-M. (2011). FieldTrip: Open Source  
618 Software for Advanced Analysis of MEG, EEG, and Invasive Electrophysiological  
619 Data. *Computational Intelligence and Neuroscience*, 2011, 9.
- 620 Saigal, S. (2014). *Preemie voices: young men and women born very prematurely*  
621 *describe their lives, challenges and achievements*: FriesenPress.
- 622 Sato, J., Mossad, S. I., Wong, S. M., Hunt, B. A. E., Dunkley, B. T., Urbain, C., & Taylor,  
623 M. J. (2019). Spectral slowing is associated with working memory performance in  
624 children born very preterm. *Sci Rep*, 9(1), 15757.
- 625 Schafer, R. J., Lacadie, C., Vohr, B., Kesler, S. R., Katz, K. H., Schneider, K. C., . . . Ment,  
626 L. R. (2009). Alterations in functional connectivity for language in prematurely born  
627 adolescents. *Brain : a journal of neurology*, 132(Pt 3), 661-670.
- 628 Scheinost, D., Lacadie, C., Vohr, B. R., Schneider, K. C., Papademetris, X., Constable,  
629 R. T., & Ment, L. R. (2015). Cerebral Lateralization is Protective in the Very  
630 Prematurely Born. *Cereb Cortex*, 25(7), 1858-1866.
- 631 Taylor, M. J., Donner, E. J., & Pang, E. W. (2012). fMRI and MEG in the study of typical  
632 and atypical cognitive development. *Neurophysiol Clin*, 42(1-2), 19-25.
- 633 Tokariev, A., Palmu, K., Lano, A., Metsäranta, M., & Vanhatalo, S. (2012). Phase  
634 synchrony in the early preterm EEG: development of methods for estimating  
635 synchrony in both oscillations and events. *NeuroImage*, 60(2), 1562-1573.
- 636 van Noort-van der Spek, I. L., Franken, M. C., & Weisglas-Kuperus, N. (2012). Language  
637 functions in preterm-born children: a systematic review and meta-analysis.  
638 *Pediatrics*, 129(4), 745-754.

- 639 Vanhatalo, S., & Kaila, K. (2006). Development of neonatal EEG activity: from  
640 phenomenology to physiology. *Semin Fetal Neonatal Med*, 11(6), 471-478.
- 641 Vieira, M. E., & Linhares, M. B. (2011). Developmental outcomes and quality of life in  
642 children born preterm at preschool- and school-age. *J Pediatr (Rio J)*, 87(4), 281-  
643 291.
- 644 Vohr, B. (2014). Speech and language outcomes of very preterm infants. *Semin Fetal*  
645 *Neonatal Med*, 19(2), 78-83.
- 646 Wechsler, D., & Naglieri, J. (2006). *Wechsler Nonverbal Scale of Ability*. San Antonio, TX:  
647 Harcourt Assessments.
- 648 Wilke, M., Hauser, T. K., Krageloh-Mann, I., & Lidzba, K. (2014). Specific impairment of  
649 functional connectivity between language regions in former early preterms. *Hum*  
650 *Brain Mapp*, 35(7), 3372-3384.
- 651 Williams, K. T. (2007). *EVT2: Expressive Vocabulary Test, second edition*. San Antonio,  
652 TX: Pearson.
- 653 Wood, A. G., Harvey, A. S., Wellard, R. M., Abbott, D. F., Anderson, V., Kean, M., . . .  
654 Jackson, G. D. (2004). Language cortex activation in normal children. *Neurology*,  
655 63(6), 1035-1044.
- 656 Woods, P. L., Rieger, I., Wocadlo, C., & Gordon, A. (2014). Predicting the outcome of  
657 specific language impairment at five years of age through early developmental  
658 assessment in preterm infants. *Early Hum Dev*, 90(10), 613-619.
- 659 Ye, A. X., AuCoin-Power, M., Taylor, M. J., & Doesburg, S. M. (2016). Disconnected  
660 neuromagnetic networks in children born very preterm: Disconnected MEG  
661 networks in preterm children. *Neuroimage Clin*, 11, 376-384.

662 Youssofzadeh, V., Williamson, B. J., & Kadis, D. S. (2017). Mapping Critical Language  
663 Sites in Children Performing Verb Generation: Whole-Brain Connectivity and  
664 Graph Theoretical Analysis in MEG. *Front Hum Neurosci*, 11, 173-173.

665 Zalesky, A., Fornito, A., & Bullmore, E. T. (2010). Network-based statistic: Identifying  
666 differences in brain networks. *NeuroImage*, 53(4), 1197-1207.

667

668

669

**Table 1: Demographics and Neuropsychological Data for Entire Sample**

|                                       |                            | <b>Preterm<br/>(n=31)</b> | <b>Term<br/>(n=42)</b> | <b>p Value</b> |
|---------------------------------------|----------------------------|---------------------------|------------------------|----------------|
| <b>Age (Years, Mean ± SD)</b>         |                            | 5.68 ± 0.84               | 5.62 ± 0.95            | 0.79           |
| <b>Gestational Age (Weeks + Days)</b> |                            | 26+0                      | 39+2                   | <0.01          |
| <b>Sex</b>                            | Females                    | 17                        | 22                     | 1              |
|                                       | Males                      | 14                        | 20                     |                |
| <b>Race</b>                           | White/Caucasian            | 19                        | 29                     | 0.79           |
|                                       | Black/African American     | 9                         | 8                      |                |
|                                       | Other/Multiple             | 1                         | 1                      |                |
|                                       | No Response                | 2                         | 4                      |                |
| <b>Ethnicity</b>                      | Hispanic/Latino/Latina     | 3                         | 1                      | 0.39           |
|                                       | Not Hispanic/Latino/Latina | 27                        | 38                     |                |
|                                       | No Response                | 1                         | 3                      |                |
| <b>Family Income</b>                  | < \$25000                  | 5                         | 4                      | 0.69           |
|                                       | \$25000-\$50000            | 3                         | 7                      |                |
|                                       | \$50000-\$75000            | 10                        | 8                      |                |
|                                       | \$75000-\$100000           | 4                         | 5                      |                |
|                                       | \$100000-\$150000          | 4                         | 10                     |                |
|                                       | >\$150000                  | 4                         | 5                      |                |
|                                       | No Response                | 1                         | 3                      |                |
| <b>Parental Education</b>             | High School Diploma        | 3                         | 4                      | 0.35           |
|                                       | Some College               | 11                        | 9                      |                |
|                                       | College Diploma            | 4                         | 2                      |                |
|                                       | Post Graduate              | 12                        | 24                     |                |
|                                       | No Response                | 1                         | 3                      |                |
| <b>Receptive Language</b>             | PPVT-4 (Mean ± SD)         | 113 ± 11.0                | 119 ± 18               | 0.08           |
| <b>Expressive Language</b>            | EVT-2 (Mean ± SD)          | 102 ± 9                   | 112 ± 16               | <0.01          |
| <b>General Abilities</b>              | WNV (Mean ± SD)            | 103 ± 15                  | 109 ± 16               | 0.13           |

Note: Categorical variables were tested using Fisher's Exact Test and p values are reported. Continuous variables were tested using t tests and p values are reported with 95% confidence intervals.

CI = Confidence Interval. SD = Standard Deviation. PPVT-4 = Peabody Picture Vocabulary Test. EVT-2 = Expressive Vocabulary Test. WNV = Wechsler Non-Verbal Scale of Ability.

670

671

672 **FIGURE CAPTIONS:**

673 **Figure 1: Functional MRI activation maps and resultant network nodes.**

674 A) Three slices through temporal, parietal, and left frontal language areas showing  
675 general linear model (GLM) analysis across all participants (EPT + TC) with typical  
676 bilateral activation in response to language stimuli (auditorily presented nouns for verb  
677 generation) versus noise condition ( $p < 0.001$ ,  $k = 8$ ) and 3D surface rendering of the  
678 normalized brain averaged across all participants to show bilateral activation from a  
679 sagittal perspective. B) The initial activation map across the entire sample is subjected  
680 to a 200-unit parcellation scheme to produce the “nodes” for network analysis, shown in  
681 blue.

682 **Figure 2: Functional connectivity indexed by phase locking value (PLV) for each**  
683 **group**

684 Phase locking value (PLV) throughout the language network identified in Figure 1 for  
685 extremely preterm children (EPT,  $n = 31$ , shown in pink) and term controls (TC,  $n = 42$ ,  
686 in black) with standard error shaded around the mean (SEM). Areas of group  
687 differences on visual inspection include segments of the beta band (20-25 Hz) and the  
688 gamma band (61-70 Hz).

689 **Figure 3: Extremely preterm children show increased beta functional connectivity**  
690 **in language network.**

691 Network “edges” showing significantly increased functional connectivity in EPT versus  
692 TC between 20 and 25 Hz during verb generation (observed at various initial thresholds  
693 ranging from  $t = 1$  to 2, 5000 iterations,  $p < 0.05$ , corrected for multiple comparisons).



694 **Figure 4: Extremely preterm children show increased gamma functional**  
695 **connectivity in language network.**

696 Network “edges” showing significantly increased functional connectivity in EPT versus  
697 TC between 61 and 70 Hz during verb generation (observed at various initial thresholds  
698 ranging from  $t = 1$  to 4, 5000 iterations,  $p < 0.05$ , corrected for multiple comparisons).

699 **Figure 5: Relationship between gamma band-limited connectivity (network**  
700 **strength) in the identified subnetwork supporting language and expressive**  
701 **language scores for the preterm group.**

702 Scores on the Expressive Vocabulary Test (EVT2) versus network strength within the  
703 significant subnetwork identified in gamma band-limited connectivity for the EPT group  
704 exclusively. Results indicate a positive bivariate correlation (Pearson’s  $r = 0.32$ ,  $p <$   
705  $0.05$ ). Correlations between EVT scores and network strength were not significant  
706 across groups or within the term control group.

707

708

709 **AUTHOR CONTRIBUTION STATEMENT**

710 **Maria Barnes-Davis, MD/PhD:** Conceptualization; Resources; Data curation; Formal  
711 analysis; Funding acquisition; Investigation; Methodology; Project administration;  
712 Roles/Writing - original draft; Writing - review & editing.

713

714 **Stephanie L. Merhar, MD/MS:** Conceptualization; Resources; Funding acquisition;  
715 Investigation; Methodology; Supervision; Writing - review & editing.

716

717 **Scott K. Holland, PhD:** Conceptualization; Supervision; Writing - review & editing.

718

719 **Nehal A. Parikh, DO/MS:** Conceptualization; Resources; Funding acquisition;  
720 Investigation; Methodology; Supervision; Writing - review & editing.

721

722 **Darren S. Kadis, PhD:** Conceptualization; Resources; Data curation; Formal analysis;  
723 Funding acquisition; Investigation; Methodology; Project administration; Supervision;  
724 Writing - review & editing.

725

**L**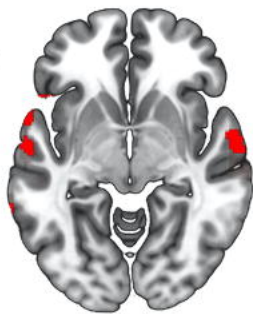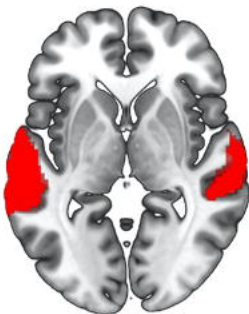**R**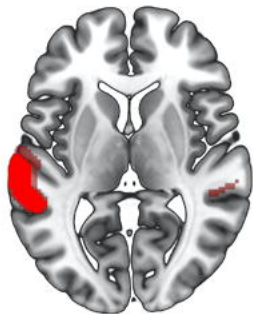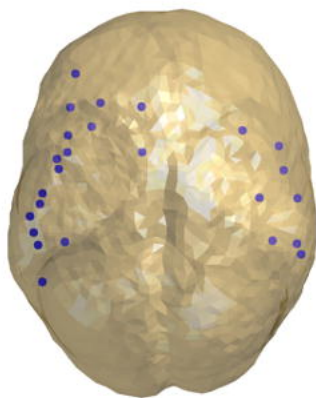

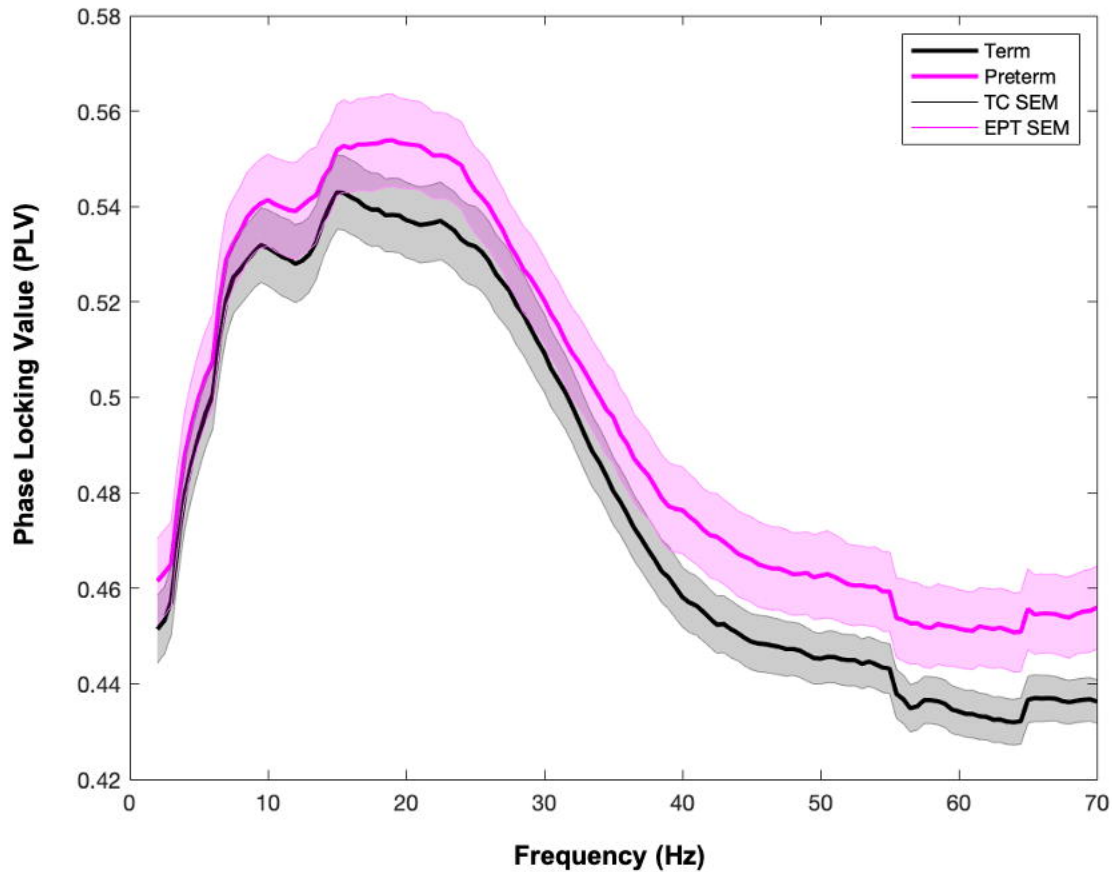

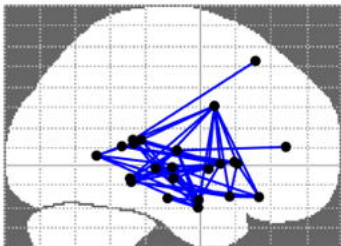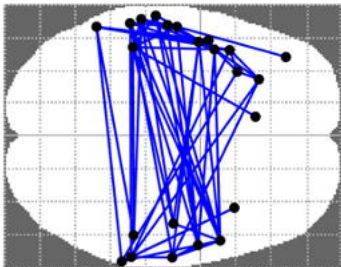

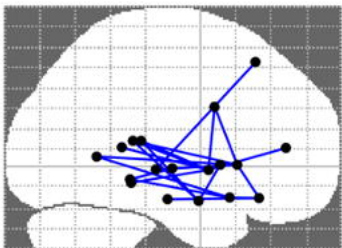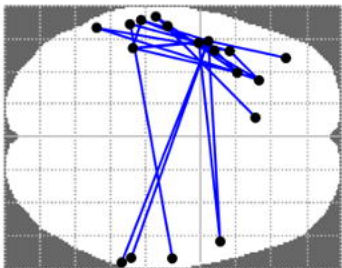

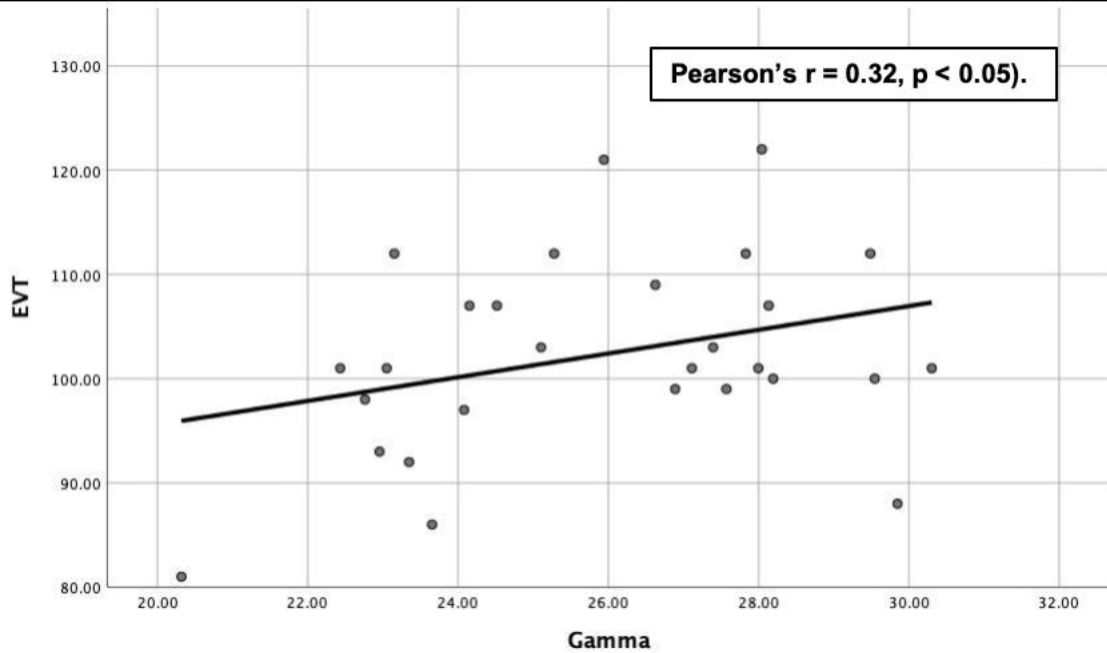

Source: https://medrxiv.org/content/10.1101/2020.10.30.20222448v1.full.pdf
